# Information processing without brains – the power of intercellular regulators in plants

Wolfgang Busch and Philip N. Benfey\*

## Summary

Plants exhibit different developmental strategies than animals; these are characterized by a tight linkage between environmental conditions and development. As plants have neither specialized sensory organs nor a nervous system, intercellular regulators are essential for their development. Recently, major advances have been made in understanding how intercellular regulation is achieved in plants on a molecular level. Plants use a variety of molecules for intercellular regulation: hormones are used as systemic signals that are interpreted at the individual-cell level; receptor peptide-ligand systems regulate local homeostasis; moving transcriptional regulators act in a switch-like manner over small and large distances. Together, these mechanisms coherently coordinate developmental decisions with resource allocation and growth.

**Key words:** Development, Hormones, Intercellular regulation, Plant biology, Protein movement, Signaling

## Introduction

Multicellularity requires elaborate communication between the different cells and tissues of an organism. Most animals have developed highly complex systems of cell-to-cell communication through efficient circulatory and chemo-electrical systems, with various specialized organs and tissues dedicated to collecting, integrating and processing endogenous and environmental information, as well as to releasing instructive signals to effector cells and tissues. Plants lack such a sophisticated infrastructure. Nevertheless, they are far from being uninformed about or unresponsive to internal or external changes. Indeed, owing to the challenges of their sessile lifestyle, powerful interfaces between the regulation of their development and external conditions could evolve. The resulting developmental plasticity is readily apparent by looking at plants of the same species that grow in different ecological niches, for example a forest-growing versus a freestanding white oak tree (Fig. 1). Numerous complex responses to environmental factors, such as light availability, contribute to the development of such divergent phenotypes.

The implementation of developmental plasticity in plants is attributable to regulators that move between cells and that orchestrate developmental responses to a changing environment. Intercellular communication is a prerequisite for the complex development that multicellular organisms undergo. Individual aspects of intercellular regulation in plants have been reviewed extensively (see De Smet et al., 2009; Giakountis and Coupland, 2008; Mitchum et al., 2008; Wolters and Jurgens, 2009); here, we aim to provide an overarching view of recent advances in

understanding plant intercellular regulators and their integration in developmental plasticity. We discuss a variety of ways in which plant cells orchestrate growth and developmental decisions by communicating and regulating biological processes over short and long distances, and cover classical plant hormones, receptor kinases and peptide-ligand systems, as well as moving regulators of transcription. Moving RNA molecules, however, are not discussed; we point the interested reader to a recent review on this topic (see Kehr and Buhtz, 2008). We conclude with a section that describes the fascinating exploitation of these communication systems by a variety of intruding organisms.

## Plant hormones serve as global signals

The most powerful players in intercellular regulation are plant hormones. These low-molecular-weight compounds act as systemic signals that can transmit information over large distances. This information is interpreted at the cellular level, and different types of cells respond differently to the same hormones. Cells are confronted with signals from different hormones at the same time and translate this cumulative systemic information into coherent responses. Owing to the broad and diverse functions of hormones, we first briefly introduce different hormones and then discuss two examples to highlight the complex interplay of hormone signaling pathways.

Plant hormones can cause dramatic phenotypic effects. Thus, it is not surprising that many of them were discovered before the dawn of molecular genetics (Sachs and Thimann, 1967; Thimann and Skoog, 1933). Modern transcriptome profiling technologies have provided a global view of their effects at the molecular level and identified hundreds to thousands of genes, the expression levels of which are modified by individual hormones (Goda et al., 2008).

Traditionally, hormones have been implicated primarily in developmental and stress-response processes. The phytohormones auxin, cytokinin, brassinosteroid, gibberellin and strigolactone appeared to be mainly involved in developmental processes, whereas the compounds abscisic acid, jasmonic acid and ethylene were associated with stress responses (Table 1). More recently, however, a large body of evidence has revealed significant interplay between different hormones (Brewer et al., 2009; Grunewald et al., 2009b; Ruzicka et al., 2009; Stepanova et al., 2008), as well as the involvement of ‘stress hormones’ in developmental processes and vice versa. As plants respond to changing environmental conditions, including stress, by altering development, this complex interplay is not surprising.

The physiology of higher plants is very different to that of animals and this is reflected in hormone signaling. There is no central nervous system that could orchestrate the release of hormones, nor are there specialized glands in which hormones are synthesized. Instead, these compounds are made in many places and transported throughout the plant by a combination of long-range transport through the vasculature (see Glossary, Box 1) and short-range modes of transport, including apoplastic (see Glossary, Box 1), symplastic (see Glossary, Box 1) and transcellular transport (Fig. 2). Whereas

Department of Biology, Institute of Genome Sciences & Policy, Center for Systems Biology, Duke University, Durham, NC 27708, USA.

\*Author for correspondence (philip.benfey@duke.edu)

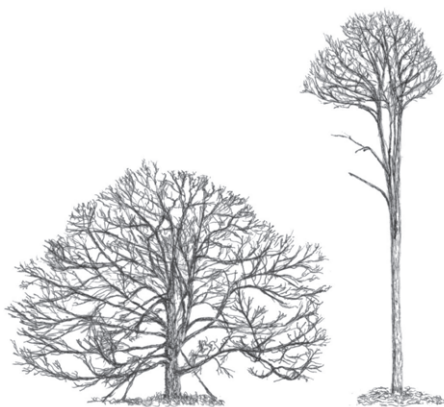

**Fig. 1. Schematic representation of two different specimens of white oak (*Quercus alba*).** The specimen on the left is a free-standing tree, whereas the tall slender tree on the right grew in a forest. Reproduced with permission from Holdrege (Holdrege, 2005).

hormones that interact with a cell-surface receptor, such as brassinosteroids (Symons et al., 2008) and cytokinins (Heyl et al., 2007), operate at least partly in the apoplast, for others, like auxin, transcellular transport appears to be more important (Blilou et al., 2005), even though there is some evidence for extracellular auxin signaling involving an apoplastic auxin receptor (Yamagami et al., 2004). Transcellular transport ties hormone action not only to its synthesis and reception, but also provides other levels of regulation, such as the expression of transporters and the compartmentalization of different types of the same hormone.

Even though it is fascinating to look at the action of individual hormones, in terms of signal transmission between different tissues of the plant, their complex interplay might hold the key to understanding their activity. The past few years have uncovered several processes in which the combinatorial action of hormones governs developmental processes. For example, the interplay of auxin and cytokinin is important for setting the border of cell proliferation and cell differentiation in the root. In the root meristem (see Glossary, Box 1), auxin application promotes cell division, whereas the addition of cytokinin promotes cell differentiation and decreases meristem size. At the border between the proliferation and differentiation zones, cytokinin signaling leads to the induction of the *SHORT HYPOCOTYL 2 (SHY2)* gene, which encodes an

inhibitor of the auxin response. The SHY2 protein, however, is degraded in an auxin-mediated fashion, thus demonstrating the convergence of auxin and cytokinin on a single gene for regulating crucial aspects of root development (Dello Ioio et al., 2007; Dello Ioio et al., 2008).

Another process that has been intensively studied for several decades, and for which the complexity of hormonal interplay has been largely resolved, is the control of shoot branching, i.e. the emergence of new shoots from buds in the axils of leaves. Most of the meristems that are located in these buds are dormant under a wide range of environmental conditions. It was recognized early on that auxin plays an important role in the state of axillary buds (see Glossary, Box 1). Upon removal of the auxin-rich primary apex (see Glossary, Box 1), bud outgrowth could be observed. The phenomenon that the apex prevents other buds from growing out is called ‘apical dominance’ (see Glossary, Box 1). The inhibitory effect of the apex could be mimicked by the application of auxin (Thimann and Skoog, 1933). Later, it was shown that auxin is synthesized in the shoot apex and that it is actively transported down the stem (Ljung et al., 2001). The direction of transport is mediated by the basal localization of the PIN auxin efflux carriers in the vasculature (Galweiler et al., 1998). However, it became clear that the effect of auxin on bud dormancy is not direct because radioactively labeled auxin led to outgrowth inhibition before the labeled auxin could be detected in the buds (Hall and Hillman, 1975).

One candidate for mediating the auxin response in the context of bud activation was cytokinin, which had been shown to be an activator of bud outgrowth (Sachs and Thimann, 1967). A tight link between cytokinin and auxin has been characterized on the molecular scale, as auxin generally represses cytokinin signaling by rapidly downregulating cytokinin biosynthesis in the shoot (Nordstrom et al., 2004). Moreover, it was shown that after the removal of the primary apex, transcripts of cytokinin biosynthesis genes and cytokinin concentrations rise very quickly in the nodal stem, and that the application of auxin inhibits this (Tanaka et al., 2006). This led to a model according to which auxin from the primary shoot apical meristem constantly downregulates local cytokinin synthesis in the shoot. The removal of the auxin source would therefore result in the elevated synthesis of cytokinin; cytokinin signaling would then activate the dormant buds.

More recently, a novel signal was identified that contributes to axillary bud activation and that moves from the root to the shoot. This signal has been identified as a strigolactone (Gomez-Roldan et

**Table 1. Plant hormones**

| Plant hormone  | Main associated functions                                             | References                                                                                 |
|----------------|-----------------------------------------------------------------------|--------------------------------------------------------------------------------------------|
| Abscisic acid  | Seed dormancy, drought responses, various growth processes            | Zhang et al., 2005                                                                         |
| Auxin          | Growth and development, defense response                              | Benkova et al., 2003; Cheng et al., 2007; Tan et al., 2007                                 |
| Brassinolide   | Growth and development                                                | Geldner et al., 2007                                                                       |
| Cytokinin      | Development, root and shoot meristem function, leaf senescence        | Hirose et al., 2008; Kurakawa et al., 2007; Rashotte et al., 2006                          |
| Ethylene       | Fruit ripening, wounding, development                                 | Christians et al., 2009; Qiao et al., 2009; Wang et al., 2004                              |
| Gibberellin    | Growth, seed development, organ elongation, control of flowering time | de Lucas et al., 2008; Feng et al., 2008; Murase et al., 2008; Shimada et al., 2008        |
| Jasmonic acid  | Stress responses, growth and development                              | Chini et al., 2007; Lorenzo et al., 2004; Thines et al., 2007                              |
| Salicylic acid | Defense response                                                      | Wang et al., 2007                                                                          |
| Strigolactone  | Shoot branching, mycorrhization                                       | Akiyama et al., 2005; Brewer et al., 2009; Gomez-Roldan et al., 2008; Umehara et al., 2008 |

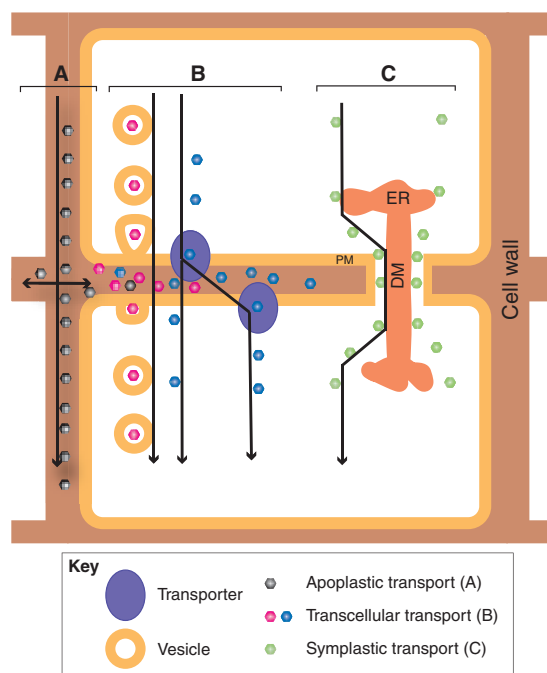

**Fig. 2. Modes of intercellular movement.** (A) The apoplastic transport of molecules occurs by diffusion in the extracellular space. (B) Transcellular transport involves passage through two plasma membranes and can occur by secretion and subsequent endocytosis, diffusion or transporter activity. (C) Symplastic transport is facilitated by plasmodesmata that connect adjacent cells. They consist of endoplasmic reticulum (ER) that is appressed into the central axial desmotubule (DM) and flanked by the plasma membrane (PM). Transport can occur through the cytoplasmic sleeve between DM and PM.

al., 2008; Umehara et al., 2008). Strigolactones are a group of substances that have been previously identified as being secreted by plants and used as signals by parasitic weeds as well as by fungi in symbiotic mycorrhiza interactions (Akiyama et al., 2005). Exogenously applied strigolactone inhibited or significantly reduced bud outgrowth after auxin depletion in several species and stopped previously initiated bud outgrowth more efficiently than auxin transport inhibitors, which supports the notion that the strigolactones act independently of auxin transport (Brewer et al., 2009).

Despite this large body of research, many details remain unclear. For instance, strigolactones move from the root to the shoot. However, the young buds are not connected to the stem through the vasculature, and thus one would not expect strigolactone levels to be very high in the bud. Moreover, this three-hormone system displays a substantial amount of emerging complexity because of internal interactions. Auxin has been shown to regulate cytokinin biosynthesis and there is evidence for auxin positively regulating strigolactone synthesis (Bainbridge et al., 2005; Foo et al., 2005; Zou et al., 2006). It is also very probable that additional hormones or signals are involved in shoot branching.

The case of shoot branching is a marvelous example of the intertwined role of hormones as intercellular regulators. First of all, hormones function as reporters of significant changes in internal or external conditions. In axillary buds, this leads to the activation of a developmental program upon removal of the primary apex. This developmental program is only activated in axillary buds and not in

### Box 1. Glossary

- Apex.** The tip of a structure, such as shoot or root.  
**Apical dominance.** The phenomenon wherein the apex controls the outgrowth of axillary buds.  
**Apoplast.** Extracellular space between plant cells that allows the free diffusion of molecules. This space includes the cell wall.  
**Axillary bud.** Predominantly dormant meristem associated with the base of leaves.  
**Boolean switch.** A switch that has two states.  
**Fasciation.** The enlargement of the plant apex by unregulated proliferative growth.  
**Florigen.** A mobile signal that is produced in the leaves and that leads to the initiation of flowering in the shoot apex.  
**Grafting.** The transplantation of a plant part, such as the root or shoot, to another individual.  
**Meristem.** Stem cell-containing structures located at the growing points in plants. Meristems provide an instructive environment for long-term stem cell maintenance and are thus regarded as stem cell niches.  
**Photoperiod.** The daily duration of light that an organism is exposed to.  
**Plasmodesma.** A plasma membrane-enclosed pore that crosses the cell wall and contains a central element of endoplasmic reticulum.  
**Symplast.** Intracellular space that is separated from the apoplast by the plasma membrane and that consists of the cytoplasm of multiple cells that are connected by plasmodesmata.  
**Vasculature.** Specialized transport tissues that consist of two separate systems in plants. The xylem transports water and nutrients from root to shoot, whereas the phloem transports the products of photosynthesis and other metabolites from source to sink.

other tissue types. This response thus depends on both the hormonal signals and the potential of the bud. The same signals, however, are also perceived and interpreted in other cells and can lead to many other developmental decisions. Thus, hormones appear to report the systemic status of the plant rather than deliver specific instructions. Plant hormones therefore coordinate many responses, such as resource usage and growth, throughout the plant and serve as chemical coordinators that allow plant developmental decisions to act in concert.

### Receptor-like kinases and peptide ligands in local homeostasis

Receptor-like kinase (RLK) peptide systems are of particular importance in plants. In addition to their fundamental role in the plant pathogen response, they play a prominent role in local developmental decisions and in maintaining local homeostasis. This is owing to the intrinsic properties of RLK peptide systems, which typically constrain them to short-range signaling. A recent review has covered the broad role of RLKs in plant development (see De Smet et al., 2009); here, we provide some instructive examples of these functions in selected systems.

The best-understood RLK model system is the *CLAVATA* (*CLV*) system, which is essential for regulating the size of the stem cell population in the shoot apical meristem (SAM). Loss-of-function mutants for each of the three *CLV* genes in *Arabidopsis* exhibit shoot fasciation (see Glossary, Box 1), enlarged floral meristems and increased numbers of floral organs (Clark et al., 1993; Clark et al., 1995; Kaye and Clark, 1998). *CLV1* and *CLV2* encode proteins with a high similarity, but whereas the *CLV1* gene encodes a leucine-rich repeat RLK, *CLV2* encodes an LRR receptor-like protein (RLP) that lacks a kinase domain (Clark et al., 1997; Jeong et al., 1999). The third gene, *CLV3*, encodes a small peptide (Fletcher et al., 1999)

that is secreted into the extracellular space (Rojo et al., 2002). Even though the molecular details were unclear, it was hypothesized that the CLV3 peptide binds the CLV1/CLV2 receptor complex and that this functional complex leads to signaling that eventually causes the repression of the *WUSCHEL* (*WUS*) transcription factor gene. This, in turn, is required to specify stem cells in the SAM. How *WUS* activity is translated into stem cell maintenance is not certain, because both *WUS* mRNA and protein are restricted to a domain directly beneath the stem cells. Intriguingly, *WUS* positively regulates the expression of *CLV3* in the stem cell domain, an interaction that creates an autoregulatory loop that fine-tunes stem cell homeostasis (Brand et al., 2000; Schoof et al., 2000) (Fig. 3). The molecular details of the interactions of the CLV proteins were unknown for a long time. Recently, it has been shown that not only must *CLV3* be processed into a 13-amino-acid peptide (MCLV3), but it also needs to be post-translationally modified for efficient binding to the CLV1 receptor (Ohyama et al., 2009).

Even though early studies of the local homeostasis of stem cell regulation in the SAM focused primarily on the role of the *CLV* system, other important components have been discovered. Recently, it has been proposed that *CLV2* and a novel RLK, *CORYNE* (*CRN*), interact via their transmembrane domains, and that this complex transmits the *CLV3* signal independently of *CLV1* (Muller et al., 2008). In the periphery of the SAM, the *BARELY ANY MERISTEM* (*BAM*) receptors are proposed to sequester *CLV3*-like ligands and thus to contribute to the complexity of receptor-mediated meristem homeostasis (Deyoung and Clark, 2008). Studies in rice (*Oryza sativa*) indicate that this basic framework of meristem maintenance is conserved across angiosperms. Based on the similarity of the intron/exon structure and the high homology of a conserved 14-amino-acid sequence (CLE domain) of *CLV3*, four *CLE* genes were found in rice and *Arabidopsis* that seem to have evolved from a common ancestor. Generally, all four genes are implicated in meristem maintenance; however, in rice, the roles of these *CLE* peptides seem to have diversified, as different *CLE* peptides appear to regulate different types of meristems (Suzaki et al., 2008).

Although the function of receptor-peptide pairs is understood most clearly in the SAM, there are other tissues in which similar pairs seem to play an important role. In the root meristem, a different RLK peptide pair has been linked to stem cell maintenance: the RLK *ARABIDOPSIS CRINKLY4* (*ACR4*) and the *CLE40* peptide control the maintenance of a stem cell population in the root (Stahl et al., 2009). Interestingly, here, the *CLE* signal originates from the differentiated cells and not from the stem cells, as in the SAM. This difference at the operational level might be due to differences in the structural organization of the root and shoot meristems. Additionally, the receptor *ACR4* has also been implicated in lateral root formation, which involves the initiation of a new meristem. In this context, it first promotes formative cell divisions for lateral root development and then constrains the number of these divisions after the onset of organogenesis (De Smet et al., 2008).

This root-specific RLK peptide pair aside, parts of the regulatory circuits that are active in the shoot, such as the *CLAVATA* signaling module, fulfill similar purposes in the root. *CRN* as well as *CLV2* have been implicated in the maintenance of the root apical meristem, because both *crn* and *clv2* mutant plants are somewhat resistant to the application of synthetic *CLE* dodeca-peptides (Miwa et al., 2008). The important role of diverse *CLE*s is underlined by the conservation of the family in various plant species, including very basal plants, like green algae and moss (Kinoshita et al., 2007; Oelkers et al., 2008).

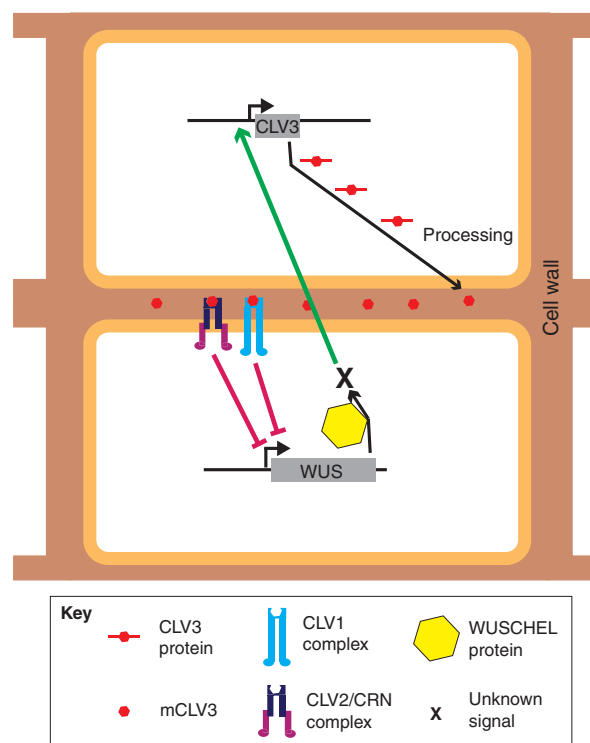

**Fig. 3. The CLAVATA signaling module in the shoot apical meristem.** The action of the transcription factor *WUSCHEL* (*WUS*) leads to the production of an unknown signal (X) that results in the transcription of *CLV3* in neighboring cells. *CLV3* protein is processed into the mature *CLV3* peptide (mCLV3), which subsequently binds to *CLV1* and to *CLV2/CRN* receptor complexes. This event eventually causes the repression of *WUS*.

Further evidence for an important role for other *CLE* peptides in *Arabidopsis* is provided by the fact that many *CLE* genes are transcribed in distinct tissues during development (Sharma et al., 2003). This supports the hypothesis that *CLE* peptides are widely employed as intercellular regulators. However, with the exception of *clv3*, no loss-of-function phenotype of a single *CLE* has been reported. Nevertheless, the overexpression and application of numerous *CLE* peptides result in developmental phenotypes in the root and shoot meristems (Kinoshita et al., 2007; Strabala et al., 2006). These data support a general role for *CLE* peptide signaling in growth and differentiation processes. However, they also indicate that various *CLE* peptides are functionally redundant or that there is receptor promiscuity for different *CLE* ligands.

To better understand the role of RLK peptide signaling on local homeostasis, a good knowledge of the interactions between specific mobile *CLE*s and stationary RLKs is crucial. Unfortunately, this has proven to be a very difficult task, mainly because the specificity of *CLE*-RLK interactions does not seem to be very high, and also because of the enormous size of the RLK family, which includes more than 600 genes in *Arabidopsis* (Shiu and Bleecker, 2001). For instance, *CLV2* can perceive several *CLE*s (Fiers et al., 2005), whereas several *CLE*s, including *CLE1* to *CLE7*, can at least partially rescue the SAM phenotypes of *clv3* mutants through a *CLV1*-dependent pathway (Ni and Clark, 2006). This supports the idea that it is not the individual *CLE* that is important, but rather that its expression domain and local concentration, as well as its post-translational modifications (as seen in MCLV3), are key to determining the specificity of RLK-*CLE* interactions.

Yet another layer of complexity comes into play when considering the processing of CLE peptides. The cleavage of CLE peptides to their mature form requires proteases. To date, only one subtilase has been demonstrated to cleave a growth-promoting pro-peptide (Srivastava et al., 2008); however, there are several other proteases implicated in RLK-CLE signaling processes. Very recently, the ectopic overexpression of the subtilase AtSBT5.4 was reported to cause a *clv*-like phenotype, which is dependent on the protease activity of the subtilase. However, AtSBT5.4 did not cleave the CLV3 peptide in an in vitro assay (Liu et al., 2009). One possibility is that this subtilase processes other signal peptides in the SAM, which might disturb the signaling balance in the tissue, possibly by competing with CLV3 for receptor binding.

RLK peptide systems act over small distances. The peptides seem to diffuse freely in the apoplast, but the diffusion rate for small molecules in the apoplastic space appears to be much lower than in water (Kramer et al., 2007), which would restrict peptide-mediated signaling to a very limited space. If the constant sequestration of the peptide ligands is assumed, a steep concentration gradient at the border of the domain from which the peptide is secreted would be established. Such a gradient would produce a high sensitivity for changes in peptide production. This property makes RLK peptide systems well-suited for regulating local homeostasis, which requires groups of cells to readjust their activity constantly to avoid losing equilibrium.

### Moving transcriptional regulators mediate short- and long-range developmental decisions

Several transcriptional regulators have been shown to move between cells and tissues. Whereas hormone and RLK-peptide pairs act indirectly on gene transcription, moving transcriptional regulators directly participate in changing the transcriptional programs of target cells. Interestingly, many of these genes are involved in fundamental developmental decisions. Most transcription factors have been described to have a range of movement of one or at most a few cell layers (Kim et al., 2002; Kim et al., 2003; Lucas et al., 1995; Nakajima et al., 2001; Perbal et al., 1996; Sessions et al., 2000; Wada et al., 2002), but there is one reported case in which a transcriptional regulator moves over longer distances (Corbesier et al., 2007; Jaeger and Wigge, 2007; Mathieu et al., 2007). Here, we first describe the structural basis for protein movement in plants, then give an overview of moving transcriptional regulators and finally discuss two cases in detail, one involving short-distance movement and the other long-distance movement.

A network of cytoplasmic connections called plasmodesmata (see Glossary, Box 1) links plant cells. Various molecules, including transcription factors, can use this system to move between cells. Primary plasmodesmata are assembled during cytokinesis and form

a plasma membrane-enclosed pore that crosses the cell wall and that contains a central element of endoplasmic reticulum. Secondary plasmodesmata have the same structure but can be formed later in development, even if two cells are not clonally related. Unlike gap junctions in animal systems, the size limits for the passage through plasmodesmata vary greatly between different tissues, ranging from 30 to 50 kDa (Crawford and Zambryski, 2001; Kim et al., 2005).

There are two modes of movement between cells via plasmodesmata: selective movement that is determined by specific sequences within the transported protein (Lucas et al., 1995) and non-selective movement without such requirements (Wu et al., 2003). A variety of molecules have been shown to move through plasmodesmata. The first proteins that were recognized to use these connections for movement between cells were viral particles that spread throughout the plant (Samuel, 1934). Later on, it was shown that plant regulatory proteins also use this path. The first of these moving regulatory proteins to be identified was the *KNOTTED1* (KN1) protein in maize (*Zea mays*) (Lucas et al., 1995). It has been reported that KN1 modulates the size exclusion limit of plasmodesmata (Kragler et al., 2000; Lucas et al., 1995). *KNOTTED1* in maize and its homologue *STM* in *Arabidopsis* are expressed in the SAM and both are downregulated in incipient leaf primordia and developing leaves. *STM* was shown to play a crucial role in maintaining stem cell homeostasis and cell indeterminacy in the SAM (Lenhard et al., 2002). To date, several other functionally characterized transcriptional regulators have also been described to move between cells (Table 2). Interestingly, these factors also play important roles in cell fate decisions. In the root, the single-repeat R3 MYB transcription factor CAPRICE is involved in the cell fate determination of hair-forming cells (Wada et al., 2002), whereas *SHORTROOT* (SHR), which belongs to the plant-specific GRAS family of transcription factors, controls aspects of radial patterning as well as the maintenance of stem cells in the quiescent center (QC) of the root meristem (Nakajima et al., 2001). Moving transcriptional regulators also control various important aspects of flower development. First of all, a small globular transcriptional regulator called *FLOWERING LOCUS T* (FT) triggers flowering (Corbesier et al., 2007; Jaeger and Wigge, 2007; Mathieu et al., 2007). Further downstream of this triggering event, the moving transcription factor *LFY* functions as a developmental switch that is necessary and sufficient to initiate floral fate in shoot meristems (Blazquez and Weigel, 1999; Weigel and Nilsson, 1995). Two other moving transcription factors, *GLOBULOSA* and *DEFICIENS*, control organ identity in the flower (Perbal et al., 1996). In addition to these well-characterized examples, further insight into the extent of transcription factor movement came from a comparison of the expression of 24 transcriptional and translational transcription factor gene GFP-fusion constructs that were expressed in a tissue-specific

**Table 2. Developmentally important moving transcriptional regulators in plants**

| Transcriptional regulator        | Associated function                              | References                                                           |
|----------------------------------|--------------------------------------------------|----------------------------------------------------------------------|
| CAPRICE (CPC)                    | Fate determination of hair-forming cells         | Wada et al., 2002                                                    |
| DEFICIENS (DEF)                  | Control of organ identity in the flower          | Perbal et al., 1996                                                  |
| FLOWERING LOCUS T (FT)           | Timing of flowering                              | Corbesier et al., 2007; Jaeger and Wigge, 2007; Mathieu et al., 2007 |
| GLOBULOSA (GLO)                  | Control of organ identity in the flower          | Perbal et al., 1996                                                  |
| KNAT1/BREVIPEDICELLUS (KNAT1/BP) | Maintenance of SAM                               | Kim et al., 2002                                                     |
| KNOTTED1 (KN1)                   | Maintenance of SAM                               | Lucas et al., 1995                                                   |
| LEAFY (LFY)                      | Transition from inflorescence to floral meristem | Sessions et al., 2000                                                |
| SHOOT MERISTEMLESS (STM)         | Maintenance of SAM                               | Kim et al., 2003                                                     |
| SHORT-ROOT (SHR)                 | Root patterning                                  | Nakajima et al., 2001                                                |

SAM, shoot apical meristem.

manner in the *Arabidopsis* root. Surprisingly, in 17% of the cases investigated, transcription occurred in a cell type that was different from the cell type in which the protein was localized (Lee et al., 2006). The molecular details and the significance of this extensive transcription factor movement are not well understood. However, two moving regulators of transcription that trigger important developmental decisions in plants have been characterized in depth.

SHR regulates the asymmetric cell divisions that occur in the stem cell population known as the cortex/endodermal initials (CEI) found in the root meristem. The first hint that SHR is an intercellular regulator was the fact that its mRNA was exclusively expressed in the stele of the root and that it was required for the asymmetric cell division involved in the formation of the adjacent ground tissue (endodermis and cortex), as well as for the specification of endodermis (Helariutta et al., 2000), with *shr* mutants lacking a cell layer between the epidermis and the stele. Further studies using immunolocalization and SHR-GFP fusion proteins showed that the SHR protein moves from the root stele into the adjacent cell layers and triggers the formative cell divisions that give rise to the endodermis and cortex (Nakajima et al., 2001). This function depends on SCARECROW (SCR), another GRAS transcription factor that is expressed in the endodermis, the CEI cell and the QC, i.e. the tissues that SHR proteins move to. Intriguingly, SHR movement is constrained to one cell layer by SCR-mediated protein sequestration to the endodermal nuclei (Cui et al., 2007). Additionally, SHR and SCR are necessary for the specification and patterning of the QC (Sabatini et al., 2003). In the ground tissue as well as in the QC, two zinc finger proteins, JACKDAW (JKD) and MAGPIE (MGP), regulate the range of SHR action. Interestingly, both JKD and MGP are also regulated by SHR and SCR (Welch et al., 2007). This reciprocal interaction highlights the fine-grained regulation of this complex system.

The movement of SHR depends on its amino acid sequence. The substitution of a single amino acid in the VHIID domain inhibits SHR movement completely (Gallagher et al., 2004). Furthermore, proper sub-cellular localization is necessary for SHR movement. A model for SHR trafficking has been proposed according to which the balance between nuclear localization and nuclear export promotes SHR movement into the ground tissue (Gallagher and Benfey, 2009).

Whereas most cases of regulatory protein movement appear to occur over short distances, as is the case for SHR, there is at least one example of a transcriptional co-activator traveling long distances to trigger an essential event in the life of a plant. Plants need to synchronize their development with environmental conditions. One crucial developmental decision for flowering plants is the switch from the vegetative to the flowering state. To produce offspring at the right time and in a synchronous manner is a complex task that involves the detection of cues that indicate the season. Among others, day length is an important parameter. However, there is a morphological problem between perceiving light signals and making the switch to the flowering stage: the switch is made in the SAM, but this is typically overgrown by emerging leaves and thus is not optimally located to perceive light. As early as the 19th century, it was recognized that the signal for flowering comes from the leaves (Hofmeister et al., 1865). More sophisticated experiments in the first half of the 20th century led to the proposal of the 'florigen' hypothesis (see Glossary, Box 1). This model defined florigen as a substance that was generated under inductive photoperiod conditions (see Glossary, Box 1) in the leaf and subsequently traveled to the apex to trigger flowering (Cajalchjan, 1936). More than two thirds of a century and a battery of new

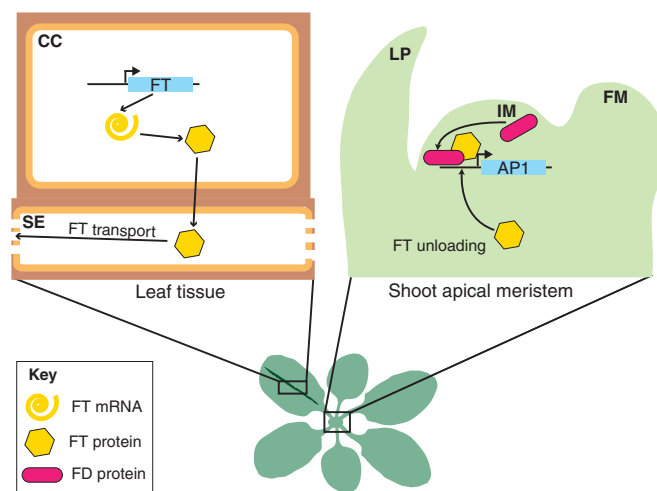

**Fig. 4. FLOWERING LOCUS T (FT) protein movement.** In suitable conditions, *FT* is transcribed in the phloem companion cells (CC) of leaves (left). *FT* is then transported into the sieve elements (SE). There, long-distance transport of *FT* occurs toward sink tissues. In the shoot apex (right), *FT* is unloaded from the phloem and acts together with FLOWERING LOCUS D (FD) to induce *APETALA 1* (*AP1*) expression. FM, floral meristem; IM, inflorescence meristem; LP, leaf primordium.

techniques were required to identify the molecular identity of the florigen. Grafting experiments (see Glossary, Box 1) showed that the photoperiodically controlled nuclear protein CONSTANS (CO) was upstream of this leaf-derived signal (An et al., 2004; Ayre and Turgeon, 2004). *FT* was a suitable candidate for the leaf-derived signal because of its known role in promoting flowering and its activation by a dexamethasone-inducible version of *CO* (Samach et al., 2000). The activation of *FT* by *CO* occurs in the leaf vascular tissue and leads to floral induction (An et al., 2004; Takada and Goto, 2003). A strong body of evidence for *FT* protein movement from the leaves to the shoot apex was generated (Corbesier et al., 2007; Jaeger and Wigge, 2007; Lifschitz et al., 2006; Lin et al., 2007; Mathieu et al., 2007; Tamaki et al., 2007) (Fig. 4), where it triggers the switch from the vegetative state of the meristem to the floral state. The bZIP protein FLOWERING LOCUS D (FD), which is exclusively expressed in the SAM, was found to interact with *FT*. Moreover, mutations in *FD* repress the overexpression phenotype of *FT* and show it to be required for *FT* activity. Chromatin immunoprecipitation and expression analysis demonstrated that *FT*, together with *FD*, activates the transcription of the floral marker gene *APETALA1* (*AP1*), which supports a role for *FT* as a transcriptional co-activator (Abe et al., 2005; Wigge et al., 2005). Despite its prominent role as a trigger for flowering, recent evidence in tomatoes (*Solanum lycopersicum*) indicates that the *FT* homolog does not only act as a switch for flowering. Rather, it has been proposed that it acts, like a hormone, as a general systemic regulator of growth and termination (Shalit et al., 2009).

These examples of moving transcriptional regulators have several characteristics in common. First, at least part of their function seems to be comparable to a Boolean switch (see Glossary, Box 1) in the target cells as opposed to gradual regulators or global signals that are interpreted at the single-cell level. In the case of SHR, a formative cell division is triggered when the protein moves to the target cell type; in the case of *FT*, the switch from a vegetative to a flowering meristem can be triggered only after *FT* reaches its target tissue.

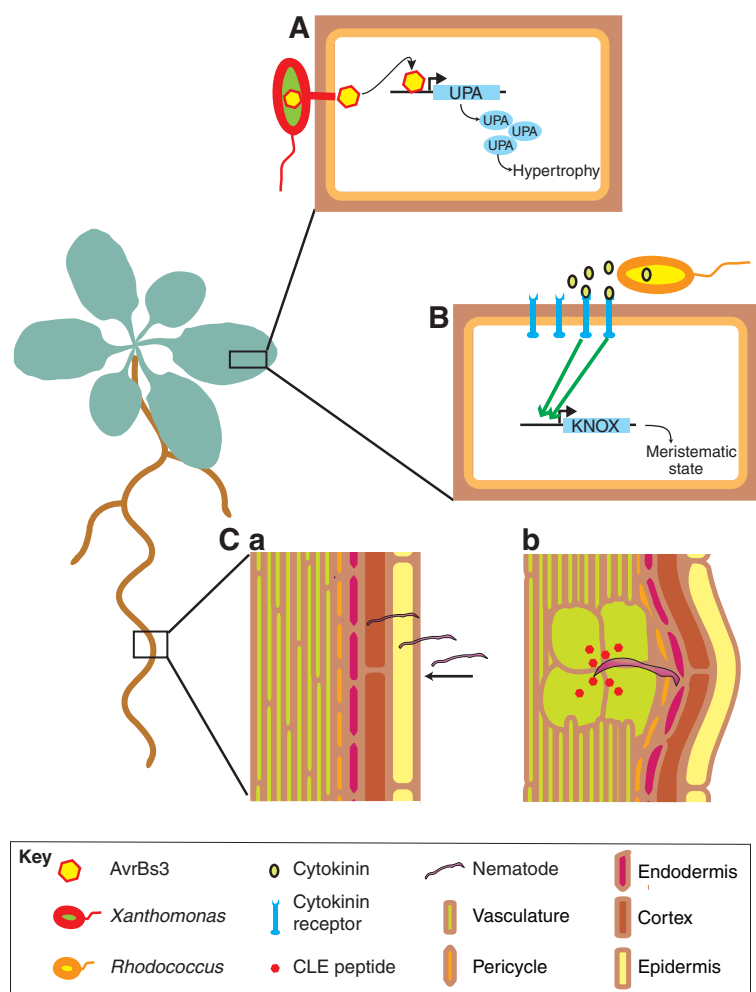

**Fig. 5. Some pathogens can usurp intercellular regulatory pathways.** Three strategies through which pathogens alter plant development are shown. (A) *Xanthomonas* bacteria secrete AvrBs3 protein into plant cells. This directly induces *upregulated by AvrBs3 (UPA)* genes that eventually lead to hypertrophy. (B) The *Rhodococcus* bacteria produce cytokinin, which activates class-I KNOTTED-like homeobox genes (*KNOX*) that convert differentiated tissue into a meristematic state. (C) Root-knot nematode worms invade the root (a) and excrete CLE peptides that lead to the dedifferentiation and the enlargement of cells that develop into feeding cells (large cells in green) for the nematodes (b).

Second, they generally appear to function together with a local co-factor that is required for their activity and that probably acts as a safeguard against the erroneous activation of target genes. For example, *SHR* regulates genes cooperatively with *SCR*, whereas *SCR* itself sequesters *SHR* to the nucleus and prevents further movement. *FT* interacts with *FD*, which is only expressed in the target tissue, and this leads to the induction of downstream targets. Taken together, the movement of transcriptional regulators seems to be used to orchestrate the coordinated expression of a set of genes for switching cellular programs at the right time and place.

### Invading organisms use intercellular signaling systems to manipulate plant development

Complex systems are prone to manipulative perturbation by imposters that deploy components similar or equal to those present in the system itself. In the case of plants, intercellular regulators are often used to modify the endogenous biological system of the plant to the advantage of pathogenic organisms (Fig. 5). Probably the most common targets for this molecular hijacking are hormonal signaling pathways. Owing to their morphogenetic power, auxin and cytokinin pathways are used by plant pathogens of all major branches of life. The disease caused by the tobacco mosaic virus is induced in part by the misregulation of auxin response genes. The mechanism that underpins this is an interaction of the virus replicase with several members of the *AUX/IAA* family of nuclear proteins that negatively regulate the auxin response. It was suggested that the virus uses this as a means to reprogram the cellular environment of older cells to

one that is more favorable for virus replication and spread (Padmanabhan et al., 2005; Padmanabhan et al., 2008). Bacteria also often interfere with auxin and cytokinin signaling, in part by synthesizing auxins and cytokinins that contribute to tumor gall formation (Lichter et al., 1995; Vandeputte et al., 2005). These galls seem to provide a favorable microenvironment and contain large numbers of cells that produce metabolites used by the bacteria. A well-characterized example of this process is the bacterial infection of *Arabidopsis* by *Rhodococcus fascians*, a Gram-positive phytopathogenic actinomycete. The host plant displays some distinct developmental and morphological changes upon infection, including serrated leaves and a stunted appearance of the aerial parts, abnormal flowers, multiple rosettes and inflorescences (de Manes et al., 2004; Vereecke et al., 2000). *Rhodococcus* infection is dependent on the *fas* operon, which contains cytokinin synthesis genes (Crespi et al., 1992). Detailed molecular analysis led to the model that *Rhodococcus* perturbs the hormonal balance of the host plant by secreting cytokinins, which cause the activation of *KNOX* genes in the plant (Depuydt et al., 2008). In *Arabidopsis*, *KNOX* genes are required for meristem function and are thought to keep cells in an undifferentiated state. The activity of these genes at the infection site keeps cells in a juvenile state and maintains the production of metabolites that are beneficial for the pathogen. Interestingly, *KNOX* gene expression and cytokinin addition result in different phenotypes, which could indicate that additional pathways are required for pathogenesis (Depuydt et al., 2008). Recent findings that a sophisticated mixture of cytokinins is used by *Rhodococcus*

(Pertry et al., 2009) indicate that there is an elaborate synchronization between cytokinin secretion and the plant response. This is probably a key to successful pathogenesis.

Fungi also have the ability to synthesize plant hormones and to manipulate host development. There is a large body of evidence that biotrophic fungal pathogens, such as powdery mildews, rusts and downy mildews, use cytokinins to generate 'green islands' (Walters and McRoberts, 2006; Walters et al., 2008). Cells in the green islands remain healthy but the surrounding tissue senesces and turns yellow. The green islands are leaf parts that are transformed into strong nutrient sinks on which the biotrophs feed. It has been shown that the concentration of nutrients within these green islands is significantly increased compared with non-infected surrounding tissues, which enables the pathogens to remove nutrients continuously (Angra and Mandahar, 1991). Some animals seem to have adopted the same trick: leafminer caterpillars can also induce green islands by cytokinin accumulation, similar to those seen at fungal infection sites (Giron et al., 2007).

Among animals, nematodes constitute a large group of plant pathogens. These roundworms have gained a remarkable ability to manipulate plant root morphology. They induce the formation of abnormally large cells in the root and then feed on these. Not surprisingly, they use auxin pathways to dedifferentiate root cells for this purpose (Grunewald et al., 2009a). Moreover, some nematodes have adopted a fascinating trick. *HgSYV46* is a gene unique to the soybean cyst nematode (Wang et al., 2001) and encodes a protein with a conserved 14-amino-acid C-terminal motif that is characteristic for the plant CLE peptide family (Olsen and Skriver, 2003), which, as discussed above, is involved in stem cell maintenance. Upon infection, this protein is highly expressed within the single dorsal esophageal gland cell of the soybean cyst nematode during syncytium formation in plants (Wang et al., 2001). Even though direct evidence on the plant side is still lacking, the location of the *HgSYV46* protein along the dorsal gland extension to the base of the nematode stylet (the oral feeding spear) in parasitic life stages suggests that *HgSYV46* is secreted into plant tissues. When expressed in *Arabidopsis*, *HgSYV46* can rescue the *clv3* mutant phenotype and lead to a *CLV3* overexpression phenotype in wild-type plants (Wang et al., 2005). In the soybean cyst nematode, a second CLE gene has been identified (Gao et al., 2003), and CLE peptide-encoding genes have been detected in beet cyst nematodes and potato cyst nematodes (Mitchum et al., 2008).

In another group of nematodes, the *16D10* gene, which encodes a 13-amino-acid secretory peptide, also displays sequence similarities to plant CLE domains. Its overexpression in *Arabidopsis* stimulates root growth but does not rescue the *clv3* mutant phenotype. In line with the root phenotype, it has been shown that 16D10 can interact with SCR-like transcription factors (Huang et al., 2006b). The silencing of *16D10* leads to decreased root-knot nematode infectivity (Huang et al., 2006a).

Not only are hormones and small peptides used to manipulate the developmental programs of the host, but transcription factors are also delivered from pathogens into plant cells. The protein AvrBs3 from the Gram-negative bacterium *Xanthomonas campestris* pv. *vesicatoria* belongs to a large family also known as transcription activator-like (TAL) effectors. After delivery into the host cell, it acts as a transcription factor and directly induces plant gene expression (Kay et al., 2007; Romer et al., 2007). In susceptible hosts, this eventually leads to a leaf hypertrophy (i.e. enlargement) phenotype (Marois et al., 2002). This appears to allow higher bacterial transmission rates by decreasing the volume of the intercellular space at the end of the bacterial growth phase, which creates

pressure that might expel the bacteria out of the leaves (Wichmann and Bergelson, 2004). Members of the AvrBs3 family and related proteins are composed of a central repeat region that mediates protein dimerization (Gurlebeck et al., 2005) and DNA binding (Kay et al., 2007). Nuclear localization signals enable entry into the eukaryotic nucleus and an acidic activation domain in the C-terminus is essential for the activation of plant gene expression (Gurlebeck et al., 2006). On the host side, transcript profiling has identified sets of AvrBs3-like protein target genes in rice (Sugio et al., 2007; Yang et al., 2006) and bell peppers (*Capsicum annuum*) (Kay et al., 2007; Marois et al., 2002). These bacterial proteins are not unique in acting as plant transcription factors. There are other candidates in bacteria that might mimic eukaryotic transcription factors as well, such as *HsvB* and *HsvG* from *Pantoea agglomerans* (Nissan et al., 2006).

Unsurprisingly, plants have evolved mechanisms to counter the pathogen-induced manipulation of their development. The treatment of plants with bacterial flagellin leads to the expression of the microRNA miR393 in *Arabidopsis*, which negatively modulates auxin signaling and contributes to the resistance to the Gram-negative bacterium *Pseudomonas syringae* (Navarro et al., 2006). Salicylic acid, a hormone involved in the pathogen response, also modifies the auxin response (Wang et al., 2007). Abnormal cytokinin levels are equally monitored by plants, and unusually high concentrations of cytokinin can induce programmed cell death (Carimi et al., 2003; Mlejnek and Prochazka, 2002) and the expression of the pathogen resistance gene *PR1* (Memelink et al., 1987).

Pathogens have found many ways to manipulate developmental aspects of their host plant by using pathways employed by plant intercellular regulators. It seems that rather than modifying one aspect of plant growth, they predominantly manipulate pathways that allow them to influence various aspects of growth and development. Given that these general target pathways are nearly universal in higher plants, it is unlikely that the plant will counterattack by altering the pathways themselves. Instead, plants use surveillance mechanisms that can detect when the target pathways are modulated and then activate pathogen defense mechanisms.

## Conclusions

By making extensive use of intercellular regulation, plants are able to undergo complex developmental processes. This enables the enormous phenotypic plasticity seen in plants, as epitomized by the aforementioned white oak trees growing in different environments (Fig. 1). Even though the mechanistic details of how such adaptations are implemented on a molecular scale over many years are not yet understood, they probably involve the combined action of all the mechanisms discussed in this review.

Recently, we have seen tremendous advances in our understanding of how intercellular signaling is controlled. This is in part owing to a variety of new and rapidly advancing technologies, including expression profiling and cell type-specific technologies and measurements (Brady et al., 2007). It seems probable that observing phenomena at the level of individual cell types, as opposed to whole organs or whole plants, will dramatically increase our understanding of many regulatory processes, including intercellular regulation. Different types of cells respond very differently to common signals such as hormones. This difference is probably attributable to their different fates and cell cycle states. Combining signal perturbations with expression profiling following fluorescence-activated cell sorting (FACS) or even single-cell RNA



extraction will lead to a better understanding of the cellular aspects of intercellular regulation. From a technological perspective, deep sequencing technologies promise to eliminate current blind spots and will help to profile additional classes of RNAs that are mobile or that are regulated by moving signals.

Other technologies, including those deployed for proteomic and metabolomic studies, applied at the level of individual cell types might help to model and infer the movement of molecules between cells, as well as their regulatory functions. The large-scale interactome project for *Arabidopsis* that is currently underway ([http://interactome.dfci.harvard.edu/A\\_thaliana/index.php](http://interactome.dfci.harvard.edu/A_thaliana/index.php)) will, in conjunction with cell-type specific ‘-omic’ datasets, provide the information needed to model intercellular regulation on a systems scale.

Another field that will strongly enhance our comprehension of intercellular regulation is high-throughput laser confocal microscopy combined with automated image processing. Currently, technologies are emerging that enable researchers to quantitatively investigate reporter gene expression and tagged protein localization (Mace et al., 2006) as well as metabolite fluxes (Wiechert et al., 2007) over extended periods of time. With such technologies, novel screens for moving regulators could be conducted. Moreover, the movement and fluxes of various kinds of molecules could be continuously tracked at a cellular resolution.

The integrative analysis of these data will enhance our comprehension of plant development and intercellular regulation. Eventually, this might lead to computer models with predictive power that take short- and long-range regulatory mechanisms into account, which in turn will provide the opportunity to delve more deeply into the systems dynamics involved in plant development.

#### Acknowledgements

We are grateful to members of the Benfey laboratory for helpful comments. Our work in this area is funded by the NIH and the NSF AT2010 program. Deposited in PMC for release after 12 months.

#### Competing interests statement

The authors declare no competing financial interests.

#### References

- Abe, M., Kobayashi, Y., Yamamoto, S., Daimon, Y., Yamaguchi, A., Ikeda, Y., Ichinoki, H., Notaguchi, M., Goto, K. and Araki, T. (2005). FD, a bZIP protein mediating signals from the floral pathway integrator FT at the shoot apex. *Science* **309**, 1052-1056.
- Akiyama, K., Matsuzaki, K. and Hayashi, H. (2005). Plant sesquiterpenes induce hyphal branching in arbuscular mycorrhizal fungi. *Nature* **435**, 824-827.
- An, H., Rousset, C., Suarez-Lopez, P., Corbesier, L., Vincent, C., Pineiro, M., Hepworth, S., Mouradov, A., Justin, S., Turnbull, C. et al. (2004). CONSTANS acts in the phloem to regulate a systemic signal that induces photoperiodic flowering of *Arabidopsis*. *Development* **131**, 3615-3626.
- Angra, R. and Mandahar, C. L. (1991). Pathogenesis of barley leaves by *Helminthosporium teres* I: Green island formation and the possible involvement of cytokinins. *Mycopathologia* **114**, 21-27.
- Ayre, B. G. and Turgeon, R. (2004). Graft transmission of a floral stimulant derived from CONSTANS. *Plant Physiol.* **135**, 2271-2278.
- Bainbridge, K., Sorefan, K., Ward, S. and Leyser, O. (2005). Hormonally controlled expression of the *Arabidopsis* MAX4 shoot branching regulatory gene. *Plant J.* **44**, 569-580.
- Benkova, E., Michniewicz, M., Sauer, M., Teichmann, T., Seifertova, D., Jurgens, G. and Friml, J. (2003). Local, efflux-dependent auxin gradients as a common module for plant organ formation. *Cell* **115**, 591-602.
- Blazquez, M. A. and Weigel, D. (1999). Independent regulation of flowering by phytochrome B and gibberellins in *Arabidopsis*. *Plant Physiol.* **120**, 1025-1032.
- Blilou, I., Xu, J., Wildwater, M., Willemsen, V., Paponov, I., Friml, J., Heidstra, R., Aida, M., Palme, K. and Scheres, B. (2005). The PIN auxin efflux facilitator network controls growth and patterning in *Arabidopsis* roots. *Nature* **433**, 39-44.
- Brady, S. M., Orlando, D. A., Lee, J. Y., Wang, J. Y., Koch, J., Dinneny, J. R., Mace, D., Ohler, U. and Benfey, P. N. (2007). A high-resolution root spatiotemporal map reveals dominant expression patterns. *Science* **318**, 801-806.
- Brand, U., Fletcher, J. C., Hobe, M., Meyerowitz, E. M. and Simon, R. (2000). Dependence of stem cell fate in *Arabidopsis* on a feedback loop regulated by CLV3 activity. *Science* **289**, 617-619.
- Brewer, P. B., Dun, E. A., Ferguson, B. J., Rameau, C. and Beveridge, C. A. (2009). Strigolactone acts downstream of auxin to regulate bud outgrowth in pea and *Arabidopsis*. *Plant Physiol.* **150**, 482-493.
- Cajalchjan, M. C. (1936). New facts in support of the hormonal theory of plant development. *Comptes Rendus De L Academie Des Sciences De L Urss* **13**, 79-83.
- Carimi, F., Zottini, M., Formentin, E., Terzi, M. and Lo, Schiavo, F. (2003). Cytokinins: new apoptotic inducers in plants. *Planta* **216**, 413-421.
- Cheng, Y., Dai, X. and Zhao, Y. (2007). Auxin synthesized by the YUCCA flavin monooxygenases is essential for embryogenesis and leaf formation in *Arabidopsis*. *Plant Cell* **19**, 2430-2439.
- Chini, A., Fonseca, S., Fernandez, G., Adie, B., Chico, J. M., Lorenzo, O., Garcia-Casado, G., Lopez-Vidriero, I., Lozano, F. M., Ponce, M. R. et al. (2007). The JAZ family of repressors is the missing link in jasmonate signalling. *Nature* **448**, 666-671.
- Christians, M. J., Gingerich, D. J., Hansen, M., Binder, B. M., Kieber, J. J. and Vierstra, R. D. (2009). The BTB ubiquitin ligases ETO1, EOL1 and EOL2 act collectively to regulate ethylene biosynthesis in *Arabidopsis* by controlling type-2 ACC synthase levels. *Plant J.* **57**, 332-345.
- Clark, S. E., Running, M. P. and Meyerowitz, E. M. (1993). CLAVATA1, a regulator of meristem and flower development in *Arabidopsis*. *Development* **119**, 397-418.
- Clark, S. E., Running, M. P. and Meyerowitz, E. M. (1995). CLAVATA3 is a specific regulator of shoot and floral meristem development affecting the same processes as CLAVATA1. *Development* **121**, 2057-2067.
- Clark, S. E., Williams, R. W. and Meyerowitz, E. M. (1997). The CLAVATA1 gene encodes a putative receptor kinase that controls shoot and floral meristem size in *Arabidopsis*. *Cell* **89**, 575-585.
- Corbesier, L., Vincent, C., Jang, S., Fornara, F., Fan, Q., Searle, I., Giakountis, A., Farrona, S., Gissot, L., Turnbull, C. et al. (2007). FT protein movement contributes to long-distance signaling in floral induction of *Arabidopsis*. *Science* **316**, 1030-1033.
- Crawford, K. M. and Zambryski, P. C. (2001). Non-targeted and targeted protein movement through plasmodesmata in leaves in different developmental and physiological states. *Plant Physiol.* **125**, 1802-1812.
- Crespi, M., Messens, E., Caplan, A. B., van Montagu, M. and Desomer, J. (1992). Fasciation induction by the phytopathogen *Rhodococcus fascians* depends upon a linear plasmid encoding a cytokinin synthase gene. *EMBO J.* **11**, 795-804.
- Cui, H., Levesque, M. P., Vernoux, T., Jung, J. W., Paquette, A. J., Gallagher, K. L., Wang, J. Y., Blilou, I., Scheres, B. and Benfey, P. N. (2007). An evolutionarily conserved mechanism delimiting SHR movement defines a single layer of endodermis in plants. *Science* **316**, 421-425.
- de Lucas, M., Daviere, J. M., Rodriguez-Falcon, M., Pontin, M., Iglesias-Pedraz, J. M., Lorrain, S., Fankhauser, C., Blazquez, M. A., Titarenko, E. and Prat, S. (2008). A molecular framework for light and gibberellin control of cell elongation. *Nature* **451**, 480-484.
- de Manes, O. C. L., Beeckman, T., Ritsema, T., Van Montagu, M., Goethals, K. and Holsters, M. (2004). Phenotypic alterations in *Arabidopsis thaliana* plants caused by *Rhodococcus fascians* infection. *J. Plant Res.* **117**, 139-145.
- De Smet, I., Vassileva, V., De Rybel, B., Levesque, M. P., Grunewald, W., Van Damme, D., Van Noorden, G., Naudts, M., Van Isterdael, G., De Clercq, R. et al. (2008). Receptor-like kinase ACR4 restricts formative cell divisions in the *Arabidopsis* root. *Science* **322**, 594-597.
- De Smet, I., Voss, U., Jurgens, G. and Beeckman, T. (2009). Receptor-like kinases shape the plant. *Nat. Cell Biol.* **11**, 1166-1173.
- Dello Ioio, R., Linhares, F. S., Scacchi, E., Casamitjana-Martinez, E., Heidstra, R., Costantino, P. and Sabatini, S. (2007). Cytokinins determine *Arabidopsis* root-meristem size by controlling cell differentiation. *Curr. Biol.* **17**, 678-682.
- Dello Ioio, R., Nakamura, K., Moubayidin, L., Perilli, S., Taniguchi, M., Morita, M. T., Aoyama, T., Costantino, P. and Sabatini, S. (2008). A genetic framework for the control of cell division and differentiation in the root meristem. *Science* **322**, 1380-1384.
- Depuydt, S., Dolezal, K., Van Lijsebettens, M., Moritz, T., Holsters, M. and Vereecke, D. (2008). Modulation of the hormone setting by *Rhodococcus fascians* results in ectopic KNOX activation in *Arabidopsis*. *Plant Physiol.* **146**, 1267-1281.
- Deyoung, B. J. and Clark, S. E. (2008). BAM receptors regulate stem cell specification and organ development through complex interactions with CLAVATA signaling. *Genetics* **180**, 895-904.
- Feng, S., Martinez, C., Gusmaroli, G., Wang, Y., Zhou, J., Wang, F., Chen, L., Yu, L., Iglesias-Pedraz, J. M., Kircher, S. et al. (2008). Coordinated regulation of *Arabidopsis thaliana* development by light and gibberellins. *Nature* **451**, 475-479.
- Fiers, M., Golemic, E., Xu, J., van der Geest, L., Heidstra, R., Stiekema, W. and Liu, C. M. (2005). The 14-amino acid CLV3, CLE19, and CLE40 peptides

- trigger consumption of the root meristem in *Arabidopsis* through a CLAVATA2-dependent pathway. *Plant Cell* **17**, 2542-2553.
- Fletcher, J. C., Brand, U., Running, M. P., Simon, R. and Meyerowitz, E. M.** (1999). Signaling of cell fate decisions by CLAVATA3 in *Arabidopsis* shoot meristems. *Science* **283**, 1911-1914.
- Foo, E., Bullier, E., Goussot, F., Foucher, F., Rameau, C. and Beveridge, C. A.** (2005). The branching gene RAMOSUS1 mediates interactions among two novel signals and auxin in pea. *Plant Cell* **17**, 464-474.
- Gallagher, K. L. and Benfey, P. N.** (2009). Both the conserved GRAS domain and nuclear localization are required for SHORT-ROOT movement. *Plant J.* **57**, 785-797.
- Gallagher, K. L., Paquette, A. J., Nakajima, K. and Benfey, P. N.** (2004). Mechanisms regulating SHORT-ROOT intercellular movement. *Curr. Biol.* **14**, 1847-1851.
- Galweiler, L., Guan, C., Muller, A., Wisman, E., Mendgen, K., Yephremov, A. and Palme, K.** (1998). Regulation of polar auxin transport by AtPIN1 in *Arabidopsis* vascular tissue. *Science* **282**, 2226-2230.
- Gao, B., Allen, R., Maier, T., Davis, E. L., Baum, T. J. and Hussey, R. S.** (2003). The parasitome of the phytoneematode *Heterodera glycines*. *Mol. Plant Microbe Interact.* **16**, 720-726.
- Geldner, N., Hyman, D. L., Wang, X., Schumacher, K. and Chory, J.** (2007). Endosomal signaling of plant steroid receptor kinase BRI1. *Genes Dev.* **21**, 1598-1602.
- Giakountis, A. and Coupland, G.** (2008). Phloem transport of flowering signals. *Curr. Opin. Plant Biol.* **11**, 687-694.
- Giron, D., Kaiser, W., Imbault, N. and Casas, J.** (2007). Cytokinin-mediated leaf manipulation by a leafminer caterpillar. *Biol. Lett.* **3**, 340-343.
- Goda, H., Sasaki, E., Akiyama, K., Maruyama-Nakashita, A., Nakabayashi, K., Li, W., Ogawa, M., Yamauchi, Y., Preston, J., Aoki, K. et al.** (2008). The AtGenExpress hormone and chemical treatment data set: experimental design, data evaluation, model data analysis and data access. *Plant J.* **55**, 526-542.
- Gomez-Roldan, V., Fermas, S., Brewer, P. B., Puech-Pages, V., Dun, E. A., Pillot, J. P., Letisse, F., Matusova, R., Danoun, S., Portais, J. C. et al.** (2008). Strigolactone inhibition of shoot branching. *Nature* **455**, 189-194.
- Grunewald, W., Cannoot, B., Friml, J. and Gheysen, G.** (2009a). Parasitic nematodes modulate PIN-mediated auxin transport to facilitate infection. *PLoS Pathog.* **5**, e1000266.
- Grunewald, W., Vanholme, B., Pauwels, L., Plovie, E., Inze, D., Gheysen, G. and Goossens, A.** (2009b). Expression of the *Arabidopsis* jasmonate signalling repressor JAZ1/TIFY10A is stimulated by auxin. *EMBO Rep.* **10**, 923-928.
- Gurlebeck, D., Szurek, B. and Bonas, U.** (2005). Dimerization of the bacterial effector protein AvrBs3 in the plant cell cytoplasm prior to nuclear import. *Plant J.* **42**, 175-187.
- Gurlebeck, D., Thieme, F. and Bonas, U.** (2006). Type III effector proteins from the plant pathogen *Xanthomonas* and their role in the interaction with the host plant. *J. Plant Physiol.* **163**, 233-255.
- Hall, S. M. and Hillman, J. R.** (1975). Correlative inhibition of lateral bud growth in *Phaseolus vulgaris* L. timing of bud growth following decapitation. *Planta* **123**, 137-143.
- Helariutta, Y., Fukaki, H., Wysocka-Diller, J., Nakajima, K., Jung, J., Sena, G., Hauser, M. T. and Benfey, P. N.** (2000). The SHORT-ROOT gene controls radial patterning of the *Arabidopsis* root through radial signaling. *Cell* **101**, 555-567.
- Heyl, A., Wulfetange, K., Pils, B., Nielsen, N., Romanov, G. A. and Schumling, T.** (2007). Evolutionary proteomics identifies amino acids essential for ligand-binding of the cytokinin receptor CHASE domain. *BMC Evol. Biol.* **7**, 62.
- Hirose, N., Takei, K., Kuroha, T., Kamada-Nobusada, T., Hayashi, H. and Sakakibara, H.** (2008). Regulation of cytokinin biosynthesis, compartmentalization and translocation. *J. Exp. Bot.* **59**, 75-83.
- Hofmeister, W. F. B., Irmisch, T., Sachs, J. and Bary, A. D.** (1865). Handbuch der physiologischen botanik, in verbindung mit A. de Bary, Th. Irmisch und J. Sachs. Leipzig: W. Engelmann.
- Holdrege, C.** (2005). The forming tree. In *Context – A Publication of The Nature Institute* **14**, 18-22.
- Huang, G., Allen, R., Davis, E. L., Baum, T. J. and Hussey, R. S.** (2006a). Engineering broad root-knot resistance in transgenic plants by RNAi silencing of a conserved and essential root-knot nematode parasitism gene. *Proc. Natl. Acad. Sci. USA* **103**, 14302-14306.
- Huang, G., Dong, R., Allen, R., Davis, E. L., Baum, T. J. and Hussey, R. S.** (2006b). A root-knot nematode secretory peptide functions as a ligand for a plant transcription factor. *Mol. Plant Microbe Interact.* **19**, 463-470.
- Jaeger, K. E. and Wigge, P. A.** (2007). FT protein acts as a long-range signal in *Arabidopsis*. *Curr. Biol.* **17**, 1050-1054.
- Jeong, S., Trotschaud, A. E. and Clark, S. E.** (1999). The *Arabidopsis* CLAVATA2 gene encodes a receptor-like protein required for the stability of the CLAVATA1 receptor-like kinase. *Plant Cell* **11**, 1925-1934.
- Kay, S., Hahn, S., Marois, E., Hause, G. and Bonas, U.** (2007). A bacterial effector acts as a plant transcription factor and induces a cell size regulator. *Science* **318**, 648-651.
- Kayes, J. M. and Clark, S. E.** (1998). CLAVATA2, a regulator of meristem and organ development in *Arabidopsis*. *Development* **125**, 3843-3851.
- Kehr, J. and Buhltz, A.** (2008). Long distance transport and movement of RNA through the phloem. *J. Exp. Bot.* **59**, 85-92.
- Kim, I., Cho, E., Crawford, K., Hempel, F. D. and Zambryski, P. C.** (2005). Cell-to-cell movement of GFP during embryogenesis and early seedling development in *Arabidopsis*. *Proc. Natl. Acad. Sci. USA* **102**, 2227-2231.
- Kim, J. Y., Yuan, Z., Cilia, M., Khalfan-Jagani, Z. and Jackson, D.** (2002). Intercellular trafficking of a KNOTTED1 green fluorescent protein fusion in the leaf and shoot meristem of *Arabidopsis*. *Proc. Natl. Acad. Sci. USA* **99**, 4103-4108.
- Kim, J. Y., Yuan, Z. and Jackson, D.** (2003). Developmental regulation and significance of KNOX protein trafficking in *Arabidopsis*. *Development* **130**, 4351-4362.
- Kinoshita, A., Nakamura, Y., Sasaki, E., Kyoizuka, J., Fukuda, H. and Sawa, S.** (2007). Gain-of-function phenotypes of chemically synthetic CLAVATA3/ESR-related (CLE) peptides in *Arabidopsis thaliana* and *Oryza sativa*. *Plant Cell Physiol.* **48**, 1821-1825.
- Kragler, F., Monzer, J., Xoconostle-Cazares, B. and Lucas, W. J.** (2000). Peptide antagonists of the plasmodesmal macromolecular trafficking pathway. *EMBO J.* **19**, 2856-2868.
- Kramer, E. M., Frazer, N. L. and Baskin, T. I.** (2007). Measurement of diffusion within the cell wall in living roots of *Arabidopsis thaliana*. *J. Exp. Bot.* **58**, 3005-3015.
- Kurakawa, T., Ueda, N., Maekawa, M., Kobayashi, K., Kojima, M., Nagato, Y., Sakakibara, H. and Kyoizuka, J.** (2007). Direct control of shoot meristem activity by a cytokinin-activating enzyme. *Nature* **445**, 652-655.
- Lee, J. Y., Colinas, J., Wang, J. Y., Mace, D., Ohler, U. and Benfey, P. N.** (2006). Transcriptional and posttranscriptional regulation of transcription factor expression in *Arabidopsis* roots. *Proc. Natl. Acad. Sci. USA* **103**, 6055-6060.
- Lenhard, M., Jurgens, G. and Laux, T.** (2002). The WUSCHEL and SHOOTMERISTEMLESS genes fulfil complementary roles in *Arabidopsis* shoot meristem regulation. *Development* **129**, 3195-3206.
- Lichter, A., Barash, I., Valinsky, L. and Manulis, S.** (1995). The genes involved in cytokinin biosynthesis in *Erwinia herbicola* pv. *gypsophylae*: characterization and role in gall formation. *J. Bacteriol.* **177**, 4457-4465.
- Lifschitz, E., Eviatar, T., Rozman, A., Shalit, A., Goldshmidt, A., Amsellem, Z., Alvarez, J. P. and Eshed, Y.** (2006). The tomato FT ortholog triggers systemic signals that regulate growth and flowering and substitute for diverse environmental stimuli. *Proc. Natl. Acad. Sci. USA* **103**, 6398-6403.
- Lin, M. K., Belanger, H., Lee, Y. J., Varkonyi-Gasic, E., Taoka, K., Miura, E., Xoconostle-Cazares, B., Gendler, K., Jorgensen, R. A., Phinney, B. et al.** (2007). FLOWERING LOCUS T protein may act as the long-distance florigenic signal in the cucurbits. *Plant Cell* **19**, 1488-1506.
- Liu, J. X., Srivastava, R. and Howell, S.** (2009). Overexpression of an *Arabidopsis* gene encoding a subtilase (AtSBT5.4) produces a clavata-like phenotype. *Planta* **230**, 687-697.
- Ljung, K., Bhalerao, R. P. and Sandberg, G.** (2001). Sites and homeostatic control of auxin biosynthesis in *Arabidopsis* during vegetative growth. *Plant J.* **28**, 465-474.
- Lorenzo, O., Chico, J. M., Sanchez-Serrano, J. J. and Solano, R.** (2004). JASMONATE-INSENSITIVE1 encodes a MYC transcription factor essential to discriminate between different jasmonate-regulated defense responses in *Arabidopsis*. *Plant Cell* **16**, 1938-1950.
- Lucas, W. J., Bouche-Pillon, S., Jackson, D. P., Nguyen, L., Baker, L., Ding, B. and Hake, S.** (1995). Selective trafficking of KNOTTED1 homeodomain protein and its mRNA through plasmodesmata. *Science* **270**, 1980-1983.
- Mace, D. L., Lee, J. Y., Twigg, R. W., Colinas, J., Benfey, P. N. and Ohler, U.** (2006). Quantification of transcription factor expression from *Arabidopsis* images. *Bioinformatics* **22**, e323-e331.
- Marois, E., Van den Ackerveken, G. and Bonas, U.** (2002). The xanthomonas type III effector protein AvrBs3 modulates plant gene expression and induces cell hypertrophy in the susceptible host. *Mol. Plant Microbe Interact.* **15**, 637-646.
- Mathieu, J., Warthmann, N., Kuttner, F. and Schmid, M.** (2007). Export of FT protein from phloem companion cells is sufficient for floral induction in *Arabidopsis*. *Curr. Biol.* **17**, 1055-1060.
- Memelink, J., Hoge, J. H. and Schilperoort, R. A.** (1987). Cytokinin stress changes the developmental regulation of several defence-related genes in tobacco. *EMBO J.* **6**, 3579-3583.
- Mitchum, M. G., Wang, X. and Davis, E. L.** (2008). Diverse and conserved roles of CLE peptides. *Curr. Opin. Plant Biol.* **11**, 75-81.
- Miwa, H., Betsuyaku, S., Iwamoto, K., Kinoshita, A., Fukuda, H. and Sawa, S.** (2008). The receptor-like kinase SOL2 mediates CLE signaling in *Arabidopsis*. *Plant Cell Physiol.* **49**, 1752-1757.
- Mlejnek, P. and Prochazka, S.** (2002). Activation of caspase-like proteases and induction of apoptosis by isopentenyladenosine in tobacco BY-2 cells. *Planta* **215**, 158-166.
- Muller, R., Bleckmann, A. and Simon, R.** (2008). The receptor kinase CORYNE of *Arabidopsis* transmits the stem cell-limiting signal CLAVATA3 independently of CLAVATA1. *Plant Cell* **20**, 934-946.

- Murase, K., Hirano, Y., Sun, T. P. and Hakoshima, T. (2008). Gibberellin-induced DELLA recognition by the gibberellin receptor GID1. *Nature* **456**, 459-463.
- Nakajima, K., Sena, G., Nawy, T. and Benfey, P. N. (2001). Intercellular movement of the putative transcription factor SHR in root patterning. *Nature* **413**, 307-311.
- Navarro, L., Dunoyer, P., Jay, F., Arnold, B., Dharmasiri, N., Estelle, M., Voinnet, O. and Jones, J. D. (2006). A plant miRNA contributes to antibacterial resistance by repressing auxin signaling. *Science* **312**, 436-439.
- Ni, J. and Clark, S. E. (2006). Evidence for functional conservation, sufficiency, and proteolytic processing of the CLAVATA3 CLE domain. *Plant Physiol.* **140**, 726-733.
- Nissan, G., Manulis-Sasson, S., Weinthal, D., Mor, H., Sessa, G. and Barash, I. (2006). The type III effectors HsvG and HsvB of gall-forming *Pantoea agglomerans* determine host specificity and function as transcriptional activators. *Mol. Microbiol.* **61**, 1118-1131.
- Nordstrom, A., Tarkowski, P., Tarkowska, D., Norbaek, R., Astot, C., Dolezal, K. and Sandberg, G. (2004). Auxin regulation of cytokinin biosynthesis in *Arabidopsis thaliana*: a factor of potential importance for auxin-cytokinin-regulated development. *Proc. Natl. Acad. Sci. USA* **101**, 8039-8044.
- Oelkers, K., Goffard, N., Weiller, G. F., Gresshoff, P. M., Mathesius, U. and Frickey, T. (2008). Bioinformatic analysis of the CLE signaling peptide family. *BMC Plant Biol.* **8**, 1.
- Ohyama, K., Shinohara, H., Ogawa-Ohnishi, M. and Matsubayashi, Y. (2009). A glycopeptide regulating stem cell fate in *Arabidopsis thaliana*. *Nat. Chem. Biol.* **5**, 578-580.
- Olsen, A. N. and Skriver, K. (2003). Ligand mimicry? Plant-parasitic nematode polypeptide with similarity to CLAVATA3. *Trends Plant Sci.* **8**, 55-57.
- Padmanabhan, M. S., Goregaoker, S. P., Golem, S., Shiferaw, H. and Culver, J. N. (2005). Interaction of the tobacco mosaic virus replicase protein with the Aux/IAA protein PAP1/IAA26 is associated with disease development. *J. Virol.* **79**, 2549-2558.
- Padmanabhan, M. S., Kramer, S. R., Wang, X. and Culver, J. N. (2008). Tobacco mosaic virus replicase-auxin/indole acetic acid protein interactions: reprogramming the auxin response pathway to enhance virus infection. *J. Virol.* **82**, 2477-2485.
- Perbal, M. C., Haughn, G., Saedler, H. and Schwarz-Sommer, Z. (1996). Non-cell-autonomous function of the Antirrhinum floral homeotic proteins DEFICIENS and GLOBOSA is exerted by their polar cell-to-cell trafficking. *Development* **122**, 3433-3441.
- Pertry, I., Vaclavikova, K., Depuydt, S., Galuszka, P., Spichal, L., Temmerman, W., Stes, E., Schmullung, T., Kakimoto, T., Van Montagu, M. C. et al. (2009). Identification of *Rhodococcus fascians* cytokinins and their modus operandi to reshape the plant. *Proc. Natl. Acad. Sci. USA* **106**, 929-934.
- Qiao, H., Chang, K. N., Yazaki, J. and Ecker, J. R. (2009). Interplay between ethylene, ETP1/ETP2 F-box proteins, and degradation of EIN2 triggers ethylene responses in *Arabidopsis*. *Genes Dev.* **23**, 512-521.
- Rashotte, A. M., Mason, M. G., Hutchison, C. E., Ferreira, F. J., Schaller, G. E. and Kieber, J. J. (2006). A subset of *Arabidopsis* AP2 transcription factors mediates cytokinin responses in concert with a two-component pathway. *Proc. Natl. Acad. Sci. USA* **103**, 11081-11085.
- Rojo, E., Sharma, V. K., Kovaleva, V., Raikhel, N. V. and Fletcher, J. C. (2002). CLV3 is localized to the extracellular space, where it activates the *Arabidopsis* CLAVATA stem cell signaling pathway. *Plant Cell* **14**, 969-977.
- Romer, P., Hahn, S., Jordan, T., Strauss, T., Bonas, U. and Lahaye, T. (2007). Plant pathogen recognition mediated by promoter activation of the pepper Bs3 resistance gene. *Science* **318**, 645-648.
- Ruzicka, K., Simaskova, M., Duclercq, J., Petrusek, J., Zazimalova, E., Simon, S., Friml, J., Van Montagu, M. C. and Benkova, E. (2009). Cytokinin regulates root meristem activity via modulation of the polar auxin transport. *Proc. Natl. Acad. Sci. USA* **106**, 4284-4289.
- Sabatini, S., Heidstra, R., Wildwater, M. and Scheres, B. (2003). SCARECROW is involved in positioning the stem cell niche in the *Arabidopsis* root meristem. *Genes Dev.* **17**, 354-358.
- Sachs, T. and Thimann, V. (1967). Role of auxins and cytokinins in release of buds from dominance. *Am. J. Bot.* **54**, 136-144.
- Samach, A., Onouchi, H., Gold, S. E., Ditta, G. S., Schwarz-Sommer, Z., Yanofsky, M. F. and Coupland, G. (2000). Distinct roles of CONSTANS target genes in reproductive development of *Arabidopsis*. *Science* **288**, 1613-1616.
- Samuel, G. (1934). The movement of tobacco mosaic virus within the plant. *Ann. App. Biol.* **21**, 90-111.
- Schoof, H., Lenhard, M., Haecker, A., Mayer, K. F., Jurgens, G. and Laux, T. (2000). The stem cell population of *Arabidopsis* shoot meristems is maintained by a regulatory loop between the CLAVATA and WUSCHEL genes. *Cell* **100**, 635-644.
- Sessions, A., Yanofsky, M. F. and Weigel, D. (2000). Cell-cell signaling and movement by the floral transcription factors LEAFY and APETALA1. *Science* **289**, 779-782.
- Shalit, A., Rozman, A., Goldshmidt, A., Alvarez, J. P., Bowman, J. L., Eshed, Y. and Lifschitz, E. (2009). The flowering hormone florigen functions as a general systemic regulator of growth and termination. *Proc. Natl. Acad. Sci. USA* **106**, 8392-8397.
- Sharma, V. K., Ramirez, J. and Fletcher, J. C. (2003). The *Arabidopsis* CLV3-like (CLE) genes are expressed in diverse tissues and encode secreted proteins. *Plant Mol. Biol.* **51**, 415-425.
- Shimada, A., Ueguchi-Tanaka, M., Nakatsu, T., Nakajima, M., Naoe, Y., Ohmiya, H., Kato, H. and Matsuoka, M. (2008). Structural basis for gibberellin recognition by its receptor GID1. *Nature* **456**, 520-523.
- Shiu, S. H. and Bleecker, A. B. (2001). Receptor-like kinases from *Arabidopsis* form a monophyletic gene family related to animal receptor kinases. *Proc. Natl. Acad. Sci. USA* **98**, 10763-10768.
- Srivastava, R., Liu, J. X. and Howell, S. H. (2008). Proteolytic processing of a precursor protein for a growth-promoting peptide by a subtilisin serine protease in *Arabidopsis*. *Plant J.* **56**, 219-227.
- Stahl, Y., Wink, R. H., Ingram, G. C. and Simon, R. (2009). A signaling module controlling the stem cell niche in *Arabidopsis* root meristems. *Curr. Biol.* **19**, 909-914.
- Stepanova, A. N., Robertson-Hoyt, J., Yun, J., Benavente, L. M., Xie, D. Y., Dolezal, K., Schlereth, A., Jurgens, G. and Alonso, J. M. (2008). TAA1-mediated auxin biosynthesis is essential for hormone crosstalk and plant development. *Cell* **133**, 177-191.
- Strabala, T. J., O'Donnell, P. J., Smit, A. M., Ampomah-Dwamena, C., Martin, E. J., Netzler, N., Nieuwenhuizen, N. J., Quinn, B. D., Foote, H. C. and Hudson, K. R. (2006). Gain-of-function phenotypes of many CLAVATA3/ESR genes, including four new family members, correlate with tandem variations in the conserved CLAVATA3/ESR domain. *Plant Physiol.* **140**, 1331-1344.
- Sugio, A., Yang, B., Zhu, T. and White, F. F. (2007). Two type III effector genes of *Xanthomonas oryzae* pv. *oryzae* control the induction of the host genes OsTFL1Agamma1 and OsTFX1 during bacterial blight of rice. *Proc. Natl. Acad. Sci. USA* **104**, 10720-10725.
- Suzuki, T., Yoshida, A. and Hirano, H. Y. (2008). Functional diversification of CLAVATA3-related CLE proteins in meristem maintenance in rice. *Plant Cell* **20**, 2049-2058.
- Symons, G. M., Ross, J. J., Jager, C. E. and Reid, J. B. (2008). Brassinosteroid transport. *J. Exp. Bot.* **59**, 17-24.
- Takada, S. and Goto, K. (2003). Terminal flower2, an *Arabidopsis* homolog of heterochromatin protein1, counteracts the activation of flowering locus T by constans in the vascular tissues of leaves to regulate flowering time. *Plant Cell* **15**, 2856-2865.
- Tamaki, S., Matsuo, S., Wong, H. L., Yokoi, S. and Shimamoto, K. (2007). Hd3a protein is a mobile flowering signal in rice. *Science* **316**, 1033-1036.
- Tan, X., Calderon-Villalobos, L. I., Sharon, M., Zheng, C., Robinson, C. V., Estelle, M. and Zheng, N. (2007). Mechanism of auxin perception by the TIR1 ubiquitin ligase. *Nature* **446**, 640-645.
- Tanaka, M., Takei, K., Kojima, M., Sakakibara, H. and Mori, H. (2006). Auxin controls local cytokinin biosynthesis in the nodal stem in apical dominance. *Plant J.* **45**, 1028-1036.
- Thimann, K. V. and Skoog, F. (1933). Studies on the growth hormone of plants: III. The inhibiting action of the growth substance on bud development. *Proc. Natl. Acad. Sci. USA* **19**, 714-716.
- Thines, B., Katsir, L., Melotto, M., Niu, Y., Mandaokar, A., Liu, G., Nomura, K., He, S. Y., Howe, G. A. and Browse, J. (2007). JAZ repressor proteins are targets of the SCF(COI1) complex during jasmonate signalling. *Nature* **448**, 661-665.
- Umehara, M., Hanada, A., Yoshida, S., Akiyama, K., Arite, T., Takeda-Kamiya, N., Magome, H., Kamiya, Y., Shirasu, K., Yoneyama, K. et al. (2008). Inhibition of shoot branching by new terpenoid plant hormones. *Nature* **455**, 195-200.
- Vandeputte, O., Oden, S., Mol, A., Vereecke, D., Goethals, K., El Jaziri, M. and Prinsen, E. (2005). Biosynthesis of auxin by the gram-positive phytopathogen *Rhodococcus fascians* is controlled by compounds specific to infected plant tissues. *Appl. Environ. Microbiol.* **71**, 1169-1177.
- Vereecke, D., Burssens, S., Simon-Mateo, C., Inze, D., Van Montagu, M., Goethals, K. and Jaziri, M. (2000). The *Rhodococcus fascians*-plant interaction: morphological traits and biotechnological applications. *Planta* **210**, 241-251.
- Wada, T., Kurata, T., Tominaga, R., Koshino-Kimura, Y., Tachibana, T., Goto, K., Marks, M. D., Shimura, Y. and Okada, K. (2002). Role of a positive regulator of root hair development, CAPRICE, in *Arabidopsis* root epidermal cell differentiation. *Development* **129**, 5409-5419.
- Walters, D. R. and McRoberts, N. (2006). Plants and biotrophs: a pivotal role for cytokinins? *Trends Plant Sci.* **11**, 581-586.
- Walters, D. R., McRoberts, N. and Fitt, B. D. (2008). Are green islands red herrings? Significance of green islands in plant interactions with pathogens and pests. *Biol. Rev. Camb. Philos. Soc.* **83**, 79-102.
- Wang, D., Pajerowska-Mukhtar, K., Culler, A. H. and Dong, X. (2007). Salicylic acid inhibits pathogen growth in plants through repression of the auxin signaling pathway. *Curr. Biol.* **17**, 1784-1790.
- Wang, K. L., Yoshida, H., Lurin, C. and Ecker, J. R. (2004). Regulation of ethylene gas biosynthesis by the *Arabidopsis* ETO1 protein. *Nature* **428**, 945-950.

- Wang, X., Allen, R., Ding, X., Goellner, M., Maier, T., de Boer, J. M., Baum, T. J., Hussey, R. S. and Davis, E. L. (2001). Signal peptide-selection of cDNA cloned directly from the esophageal gland cells of the soybean cyst nematode *Heterodera glycines*. *Mol. Plant Microbe Interact.* **14**, 536-544.
- Wang, X. H., Mitchum, M. G., Gao, B. L., Li, C. Y., Diab, H., Baum, T. J., Hussey, R. S. and Davis, E. L. (2005). A parasitism gene from a plant-parasitic nematode with function similar to CLAVATA3/ESR (CLE) of *Arabidopsis thaliana*. *Mol. Plant Pathol.* **6**, 187-191.
- Weigel, D. and Nilsson, O. (1995). A developmental switch sufficient for flower initiation in diverse plants. *Nature* **377**, 495-500.
- Welch, D., Hassan, H., Blilou, I., Immink, R., Heidstra, R. and Scheres, B. (2007). *Arabidopsis* JACKDAW and MAGPIE zinc finger proteins delimit asymmetric cell division and stabilize tissue boundaries by restricting SHORT-ROOT action. *Genes Dev.* **21**, 2196-2204.
- Wichmann, G. and Bergelson, J. (2004). Effector genes of *Xanthomonas axonopodis* pv. *vesicatoria* promote transmission and enhance other fitness traits in the field. *Genetics* **166**, 693-706.
- Wiechert, W., Schweissgut, O., Takanaga, H. and Frommer, W. B. (2007). Fluxomics: mass spectrometry versus quantitative imaging. *Curr. Opin. Plant Biol.* **10**, 323-330.
- Wigge, P. A., Kim, M. C., Jaeger, K. E., Busch, W., Schmid, M., Lohmann, J. U. and Weigel, D. (2005). Integration of spatial and temporal information during floral induction in *Arabidopsis*. *Science* **309**, 1056-1059.
- Wolters, H. and Jurgens, G. (2009). Survival of the flexible: hormonal growth control and adaptation in plant development. *Nat. Rev. Genet.* **10**, 305-317.
- Wu, X., Dinneny, J. R., Crawford, K. M., Rhee, Y., Citovsky, V., Zambryski, P. C. and Weigel, D. (2003). Modes of intercellular transcription factor movement in the *Arabidopsis* apex. *Development* **130**, 3735-3745.
- Yamagami, M., Haga, K., Napier, R. M. and Iino, M. (2004). Two distinct signaling pathways participate in auxin-induced swelling of pea epidermal protoplasts. *Plant Physiol.* **134**, 735-747.
- Yang, B., Sugio, A. and White, F. F. (2006). Os8N3 is a host disease-susceptibility gene for bacterial blight of rice. *Proc. Natl. Acad. Sci. USA* **103**, 10503-10508.
- Zhang, X., Garretton, V. and Chua, N. H. (2005). The AIP2 E3 ligase acts as a novel negative regulator of ABA signaling by promoting ABI3 degradation. *Genes Dev.* **19**, 1532-1543.
- Zou, J., Zhang, S., Zhang, W., Li, G., Chen, Z., Zhai, W., Zhao, X., Pan, X., Xie, Q. and Zhu, L. (2006). The rice HIGH-TILLERING DWARF1 encoding an ortholog of *Arabidopsis* MAX3 is required for negative regulation of the outgrowth of axillary buds. *Plant J.* **48**, 687-698.
